# Supplementary material
Source: PubMed Central journal article supplement (PMC9106811)
Supplement: NIHMS1767754-supplement-1.pdf [file NIHMS1767754-supplement-1.pdf]

## Supplementary data.

### Immunocytochemistry

Confluent mCCD<sub>c11</sub> cells grown in 3D culture on Transwell filter inserts were fixed with 4% paraformaldehyde, permeabilized and blocked with 2% BSA + 0.1% Triton X in PBS for 15 min before incubation with primary antibodies (1:100; K<sub>ir</sub>4.1 # A9826 Abclonal, K<sub>ir</sub>5.1 #APR-123 Alomone, N<sup>+</sup>/K<sup>+</sup>-ATPase #sc-21712 Santa Cruz) in a 2% BSA-PBS solution overnight at 4<sup>o</sup> C. After washing, cells were probed with Alexa labeled secondary antibodies (1:500) then incubated with Hoescht nuclear dye (100 µg ml<sup>-1</sup>) before mounting on slides with Fluormount. Cells were imaged on a Nikon A1 at 60x with Elements software with 1µm z-steps, and final maximum projection images were processed using ImageJ.

**Supplementary Figure 1.** The expression of K<sub>ir</sub>5.1, K<sub>ir</sub>4.1, and Na<sup>+</sup>/K<sup>+</sup>-ATPase in polarized mCCD<sub>c11</sub> cells. Confocal images of mCCD<sub>c11</sub> cells labeled with Hoechst nuclear dye and antibodies for K<sub>ir</sub>4.1, K<sub>ir</sub>5.1, and N<sup>+</sup>/K<sup>+</sup>-ATPase confirm the expression of these proteins in cultured mCCD<sub>c11</sub> cells. Scale bars are 20 µm.

**Supplementary Figure 2.** Effect of K<sub>ir</sub>1.1 (ROMK) potassium channel inhibitor VU591 on short-circuit current ( $I_{eq}$ ) in polarized epithelial cortical collecting principal mCCD<sub>c11</sub> cells. Apical application of 1 µM VU591 did not produce significant changes in amiloride-sensitive  $I_{eq}$  measured at different time points (n=5 per point).

**Supplementary Figure 3.** Effect of amitriptyline (a) and VU992 (b) in CHO cells overexpressing ENaC. Examples of ENaC single-channel activity and response to amitriptyline (n = 5) and VU992 (n = 6). Conformational closed (c) and open states are indicated by solid and dashed lines, correspondingly. Summary graphs demonstrating single-channel activity ( $NP_o$ ) (right panel).
